# Supplementary material
Source: publisher figshare collection journal article supplement (https://gsajournals.figshare.com/ndownloader/files/25800101)
Supplement: Supplementary file 1 [file 25800101]

## Sheet: Cl2
	Expected - Post MF							Unexpected - Ant MF									Undeterminable
	Ranking H	FlybaseID	GeneSymbol	RNAi screen	FPKM_120h_eye	Subcluster			Ranking H	FlybaseID	GeneSymbol	RNAi screen	FPKM_120h_eye	Subcluster			Ranking H	FlybaseID	GeneSymbol	RNAi screen	FPKM_120h_eye	Subcluster
unbiased	250	FBgn0039255	CG13646	Y	9.91655	2A		unbiased	792	FBgn0002734	HLHmdelta (*)	N	207.701	2A		unbiased	434	FBgn0037107	CG7166	N	5.24879	2A
unbiased	127	FBgn0261514	nimA	Y	4.97312	2A		unbiased	720	FBgn0031268	cold	N	126.198	2B		unbiased	868	FBgn0052192	CG32192	N	9.7849	2B
unbiased	40	FBgn0026197	noe	Y	322.738	2A		unbiased	422	FBgn0035677	CG13293	N	6.18674	2A		unbiased	655	FBgn0004242	Syt1	N	10.8453	2B
unbiased	455	FBgn0039916	CG9935	Y	43.8913	2A		unbiased	205	FBgn0000557	Ef1alpha100E	N	72.2685	2A		unbiased	314	FBgn0026592	Fie	N	4.91049	2A
unbiased	441	FBgn0263117	CG34377	Y	131.385	2A		unbiased	624	FBgn0262891	CG43246	N	60	2B		unbiased	659	FBgn0037902	CG5281	N	7.80553	2A
unbiased	676	FBgn0000024	Ace	Y	13.7159	2A		unbiased	334	FBgn0052179	Krn	N	4.1	2A		unbiased	704	FBgn0086679	p	N	16.6226	2A
unbiased	781	FBgn0035246	CG13928	Y	56.0343	2A										unbiased	824	FBgn0031320	CG5126	N	45.6305	2A
unbiased	204	FBgn0032741	Side (*)	Y	12.3984	2A				FlybaseID	GeneSymbol	RNAi screen	FPKM_120h_eye	Subcluster		unbiased	984	FBgn0015721	king-tubby	N	2.8446	2A
unbiased	366	FBgn0038522	CG18139 - Hmx (*)	Y (**)	12.168	2A		candidate	146	FBgn0000370	crc (*)	Y (**)	2223.43	2B		unbiased	605	FBgn0085420	CG34391	N	4.23527	2A
unbiased	546	FBgn0028996	onecut (*)	Y	11.4346	2A										unbiased	552	FBgn0039734	Tace	N	8.67456	2A
unbiased	544	FBgn0259822	Ca-beta	Y	9.75771	2B										unbiased	520	FBgn0035132	mthl10	N	20.8772	2A
unbiased	309	FBgn0259224	CG42324	Y	7.94256	2A										unbiased	788	FBgn0031195	CG17600	N	31.4669	2A
unbiased	557	FBgn0028509	cenG1A	Y (**)	15.9007	2A										unbiased	458	FBgn0039718	CG15517	N	4.91426	2A
unbiased	649	FBgn0030723	dpr18	Y	5.9778	2A										unbiased	598	FBgn0039026	CG7029	N	22.1375	2A
unbiased	888	FBgn0016032	lbm	Y	23.1096	2A										unbiased	387	FBgn0054007	CG34007	N	10.8884	2A
unbiased	776	FBgn0003053	peb (*)	N (known)	58.7606	2A										unbiased	158	FBgn0036618	Cpr72Eb	N	9.81988	2B
unbiased	281	FBgn0037665	CG16733	Y	107.507	2A
unbiased	858	FBgn0051030	CG31030	Y	12.2843	2A												FlybaseID	GeneSymbol	RNAi screen	FPKM_120h_eye	Subcluster
unbiased	660	FBgn0243486	rdo	Y (**)	103.26	2A										candidate	12	FBgn0000568	Eip75B (*)	Y (**)	71.8822	2A
unbiased	530	FBgn0030892	CG7206	Y (**)	40.3658	2A										candidate	66	FBgn0013948	Eip93F (*)	Y (**)	4.82349	2A
unbiased	525	FBgn0030421	CG3812	Y	7.79443	2A
		FlybaseID	GeneSymbol	RNAi screen	FPKM_120h_eye	Subcluster
candidate	143	FBgn0085414	dpr12	Y (**)	12.8182	2A
candidate	293	FBgn0051619	CG31619	Y (**)	14.9702	2A
candidate	907	FBgn0040305	MTF-1 (*)	Y	17.0956	2A
candidate	93	FBgn0086910	l(3)neo38 (*)	Y (**)	173.783	2A
candidate	721	FBgn0033983	CG10253	N	3.63107	2A
candidate	414	FBgn0039723	CG15522	Y (**)	22.4366	2A
		(*) putative DNA binding protein
		(**) phenotype upon down regulation by RNAi

## Sheet: Cl7
	Expected - Ant MF / cell cycle						Expected - Ant MF? <50%							Undeterminable - unbiasedly chosen (1) 6,25%
	unbiasedly chosen (9) 56,25%						unbiasedly chosen (6) 37,5%								FlybaseID	GeneSymbol	Expr pattern	RNAi screen	FPKM_120h_eye
	FlybaseID	GeneSymbol	Expr pattern	RNAi screen	FPKM_120h_eye			FlybaseID	GeneSymbol	Expr pattern	RNAi screen	FPKM_120h_eye		unbiased	FBgn0002673	twe	100		2.35621
unbiased	FBgn0003124	polo	Cell cycle	N	146.578		unbiased	FBgn0062440	CG17680	Ant MF	N	53.7668
unbiased	FBgn0003607	Su(var)205	Ant MF / Cell cycle	N	460.357		unbiased	FBgn0039558	BCAS2	Ant MF	N	50.9295
unbiased	FBgn0035755	CG14830	Ant MF / Cell cycle	N	28.3783		unbiased	FBgn0030177	CG2972	Ant MF	N	18.9569
unbiased	FBgn0052038	CG32038	Ant MF	N	66.0835		unbiased	FBgn0086451	l(2)k09022	Ant MF	N	8.98058
unbiased	FBgn0003189	r	Ant MF	N	12.7993		unbiased	FBgn0020639	Lcp65Af	Ant MF	N	33.5508
unbiased	FBgn0003479	spn-A	Ant MF	N	13.6803		unbiased	FBgn0035063	Eap	Ant MF	N	32.5282
unbiased	FBgn0032586	Tpr2	Ant MF	N	140.54
unbiased	FBgn0026149	BCL7-like	Ant MF	N	51.3303			FlybaseID	GeneSymbol	Expr pattern	RNAi screen	FPKM_120h_eye
unbiased	FBgn0033378	tsu	Cell cycle	N	143.098		candidate	FBgn0259789	vfl (*)	Ant MF peripodial membrane?	N	38.7245
															K-W	p-value: 0.198121
	FlybaseID	GeneSymbol	Expr pattern	RNAi screen	FPKM_120h_eye
candidate	FBgn0004652	fru (*)	Ant MF	Y	9.22778
candidate	FBgn0010278	Ssrp (*)	Cell cycle	N	88.2108
candidate	FBgn0010328	woc (*)	Ant MF	N	43.4539
candidate	FBgn0260789	mxc (*)	Ant MF / Cell cycle	N	7.11181
	(*) putative DNA binding protein

## Sheet: Cl9
Expected - Ant MF / cell cycle								Expected - Ant MF? <50%								Undeterminable
	FlybaseID	GeneSymbol	Core	Expr pattern	RNAi screen	FPKM_120h_eye			FlybaseID	GeneSymbol	Core	Expr pattern	RNAi screen	FPKM_120h_eye			FlybaseID	GeneSymbol	Core	Expr pattern	RNAi screen	FPKM_120h_eye
unbiased	FBgn0263258	chas	Y	Ant MF	N	47.4826		unbiased	FBgn0038043	CG17202	Y	Ant MF	N	109.357		unbiased	FBgn0032896	CG14400	Y	Homogeneous / Glial cells	N	3.19432
unbiased	FBgn0053116	CG33116	N	Ant MF peripodial membrane	N	25.8863		unbiased	FBgn0261477	slim	N	Ant MF / Glial cells?	N	22.0904		unbiased	FBgn0086444	l(2)37Cb	N		N	15.4048
unbiased	FBgn0053182	Kdm4B	Y	Ant MF / Cell cycle	N	27.4903		unbiased	FBgn0063485	Lasp	N	Ant MF peripodial membrane	N	22.3231		unbiased	FBgn0033348	CG8247	N		N	7.76619
unbiased	FBgn0030452	CG4330	N	Ant MF peripodial membrane	N	5.95637		unbiased	FBgn0050157	CG30157	N	Ant MF	N	3.06021		unbiased	FBgn0259174	Nedd4	Y		N	31.6707
unbiased	FBgn0015907	bl	Y	Ant MF	N	182.747		unbiased	FBgn0036828	CG6841	N	Ant MF	N	14.0727		unbiased	FBgn0037633	CG9839	N	Heterogeneous	N	16.7089
								unbiased	FBgn0261983	l(2)gd1	N	Ant MF	N	11.1917		unbiased	FBgn0024753	Flo-2	Y		N	27.4356
	FlybaseID	GeneSymbol	Core	Expr pattern	RNAi screen	FPKM_120h_eye		unbiased	FBgn0035157	CG13894 (*)	Y	Ant MF	N	18.322										KW	p-value: 0.073249
candidate	FBgn0032979	CG1832 - Clamp (*)	N	Ant MF peripodial membrane	Y (**)	59.2403		unbiased	FBgn0001247	Ide	N	Ant MF	N	26.8343
candidate	FBgn0036134	fd68A (*)	N	Ant MF peripodial membrane	Y (**)	63.7871
candidate	FBgn0000541	E(bx) (*)	N	Ant MF / Cell cycle	Y (**)	53.8829			FlybaseID	GeneSymbol	Core	Expr pattern	RNAi screen	FPKM_120h_eye
candidate	FBgn0035769	CTCF (*)	Y	Ant MF	Y	40.3108		candidate	FBgn0001994	crp (*)	N	Ant MF peripodial membrane	Y (**)	70.1824
candidate	FBgn0039712	CG15514 (*)	N	Ant MF	Y (**)	32.1246
	(*) putative DNA binding protein
	(**) phenotype upon donwregulation by RNAi

## Sheet: Statistics
Comparison of ISH Results
Expected ISH patterns were calculated assuming Culsters 2, 7 and 9 contain genes expressed in similar patterns, and this expectation compared with the observed results using the C2 test
		Expected	Observed
	Cl2 post	14	27
	Cl7 post	6	0
	Cl9 post	7	0
	Cl2 ant	16	7
	Cl7 ant	6	13
	Cl9 ant	8	10
	Cl2 und	22	18
	Cl7 und	9	8
	Cl9 und	10	15
Null Hypothesis	P value
Clusters 2,7,9 contain similarly expressed genes	1.27529e-06
posteriorly expressed genes are equally frequent	3.59591e-06
anteriorly expressed genes are equaly frequent	0.00104412
genes with indeterminate expression are equally frequent	0.188399
Similar analysis using only data from genes selected for ISH without regard to RNAi result
		Expected	Observed
	Cl2 post	12	21
	Cl7 post	4	0
	Cl9 post	5	0
	Cl2 ant	11	6
	Cl7 ant	4	9
	Cl9 ant	5	5
	Cl2 und	20	16
	Cl7 und	8	7
	Cl9 und	9	14
Null Hypothesis	P value
Clusters 2,7,9 contain similarly expressed genes	0.000478929
posteriorly expressed genes are equally frequent	0.000380129
anteriorly expressed genes are equaly frequent	0.0141031
genes with indeterminate expression are equally frequent	0.157019

## Sheet: SensProbes
Sens probe
GeneSymbol	#ED	Post MF (%)	Ant MF (%)	Undeter (%)
klg	7	0	57.1429	42.8571
Ace	13	0	46.1538	53.8462
cpo	13	0	46.1538	53.8462
CG43246	15	0	40	60
rdo	4	0	25	75
boss	28	7*	10.7143	82.1429
CG13293	10	0	0	100
Fie	3	0	0	100
onecut	9	0	0	100
string	27	0	0	100
Syt1	4	0	0	100
trn	1	0	0	100
(*) neuronal? projections posterior to the MF

## Sheet: Riboprobes Primers
Cluster 2	FlybaseID	GeneSymbol	Riboprobe size (bp)	Forward primer	5’→3’	Reverse primer	5’→3’
	FBgn0039255	CG13646	598	CG13646F	GGCCGCGGccgtcgccagaatgctaaac	CG13646R	CCCGGGGCgatgaccaggccgactatga
	FBgn0261514	nimA	604	nimAF	GGCCGCGGactgcgatgagaagccttgc	nimAR	CCCGGGGCggcagtggttcgtggaagtt
	FBgn0026197	noe	608	noeF	GGCCGCGGtgtccgttggtagccgaagt	noeR	CCCGGGGCtgctgttgggcgtcgtgtta
	FBgn0039916	CG9935	437	CG9935F	GGCCGCGGgtcccaacatcagagccaac	CG9935R	CCCGGGGCgatccgctatctagagtgcc
	FBgn0263117	CG34377	599	CG34377F	GGCCGCGGgagcaggccaacgaagcaat	CG34377R	CCCGGGGCagtgtgcgagtgtgcgtgtt
	FBgn0000024	Ace	598	AceF	GGCCGCGGaaaggccaagcagacggagt	AceR	CCCGGGGCggacaggtgcagtgatagca
	FBgn0035246	CG13928	600	CG13928F	GGCCGCGGagcgtgcggttgtcaagtttc	CG13928R	CCCGGGGCggcgactggtttttgcactc
	FBgn0085414	dpr12	602	dpr12F	GGCCGCGGtccaaccacaaggcacacag	dpr12R	CCCGGGGCccagctctggcaacacatca
	FBgn0051619	CG31619	602	CG31619F	GGCCGCGGgctccaagagctgtggcatt	CG31619R	CCCGGGGCccctgcatcgcgaaacgtaat
	FBgn0032741	Side (*)	591	SideF	GGCCGCGGtggagatctgtccccattcg	SideR	CCCGGGGCccggaaaactgggactcaac
	FBgn0038522	CG18139 - Hmx (*)	601	HmxF	GGCCGCGGgttccaacgaatccgacgag	HmxR	CCCGGGGCgagcgttgttgcatgtggag
	FBgn0040305	MTF-1 (*)
	FBgn0086910	l(3)neo38 (*)	569	l(3)neo38F	GGCCGCGGctgcccatctccatacagca	l(3)neo38R	CCCGGGGCttcagcgccgcattgcagat
	FBgn0028996	onecut (*)	598	onecutF	GGCCGCGGcgtgcacgtggatgatatgg	onecutR	CCCGGGGCtgtagcctcgctggattggt
	FBgn0259822	Ca-beta	604	Ca-betaF	GGCCGCGGgtgcaggacacatcgtttgc	Ca-betaR	CCCGGGGCagacccatttggggaccaac
	FBgn0259224	CG42324	421	CG42324F	GGCCGCGGaacccgaaagcggcagagat	CG42324R	CCCGGGGCcgatttccctctgcagcttg
	FBgn0028509	cenG1A	598	cenG1AF	GGCCGCGGatgtgcacggcaaggagattc	cenG1AR	CCCGGGGCgcctgtttggtcttgctgct
	FBgn0030723	dpr18	570	dpr18F	GGCCGCGGgcgatgttgggtcatctcct	dpr18R	CCCGGGGCttgatttgcctgcttagttgctca
	FBgn0016032	lbm	327	lbmF	GGCCGCGGgtgctgtcttcctgctgatc	lbmR	CCCGGGGCcactagcacccaggacacta
	FBgn0003053	peb (*)	586	pebF	GGCCGCGGaatcaccatcagcagcagcag	pebR	CCCGGGGCaccggatgtggttggtgaac
	FBgn0037665	CG16733	609	CG16733F	GGCCGCGGggatctggttcgcaatctgc	CG16733R	CCCGGGGCgcaagtggggtttttcacacg
	FBgn0051030	CG31030	608	CG31030F	GGCCGCGGtgctgaaggttccgaggaga	CG31030R	CCCGGGGCgcgaactctcgaatcggttg
	FBgn0243486	rdo	605	rdoF	GGCCGCGGcgtctgcaccattgacgaac	rdoR	CCCGGGGCgcgtattccttcggggaaag
	FBgn0033983	CG10253	592	CG10253F	GGCCGCGGtatcgggagccatcacctgt	CG10253R	CCCGGGGCcaggacttctccggtttcag
	FBgn0030892	CG7206	589	CG7206F	GGCCGCGGccagcgtctcatgctgttaag	CG7206R	CCCGGGGCaaagcgtattgctcgcatggc
	FBgn0030421	CG3812	604	CG3812F	GGCCGCGGgatgttaaccggcgcatcaag	CG3812R	CCCGGGGCctggctgtgtgtgtgtgtgt
	FBgn0039723	CG15522
	FBgn0002734	HLHmdelta (*)	578	HLHmdeltaF	GGCCGCGGcgagtggccaatcctcaatc	HLHmdeltaR	CCCGGGGCatgaggctaagtggaagctcg
	FBgn0031268	cold	572	coldF	GGCCGCGGagtggcgctccttcaagaca	coldR	CCCGGGGCacgtcaaagttgctttattgtggg
	FBgn0035677	CG13293	458	CG13293F	GGCCGCGGtcctcctacgtgcagttcttc	CG13293R	CCCGGGGCaatgatttacgccggcagcc
	FBgn0000557	Ef1alpha100E	602	Ef1alpha100EF	GGCCGCGGggtcattggccatgtggact	Ef1alpha100ER	CCCGGGGCtgaaccagggcatcttctcg
	FBgn0262891	CG43246	249	CG43246F	GGCCGCGGatactatgaatgccaaagtctgc	CG43246R	CCCGGGGCgttatagccccatggtaaaactg
	FBgn0052179	Krn	599	KrnF	GGCCGCGGtgctgcttgccaccgcttta	KrnR	CCCGGGGCggaggctttcgcttgaaggt
	FBgn0000370	crc (*)	599	crcF	GGCCGCGGgaactggcagcagctcaatg	crcR	CCCGGGGCaggacaggctgcgtactttg
	FBgn0037107	CG7166	614	CG7166F	GGCCGCGGccaccagttctacacgcgaaa	CG7166R	CCCGGGGCtcatggatcgggcaaatggg
	FBgn0052192	CG32192	364	CG32192F	GGCCGCGGcggtcgttcaaaattcgtgttc	CG32192R	CCCGGGGCgcttttgattccccaagctag
	FBgn0004242	Syt1	596	Syt1F	GGCCGCGGaacggatgaccgcgagagta	Syt1R	CCCGGGGCggaaacctttcccaaactgagc
	FBgn0026592	Fie	603	FieF	GGCCGCGGtgtatctgggcagcaatggata	FieR	CCCGGGGCtctgtgccacaaaatagaaatacct
	FBgn0037902	CG5281	596	CG5281F	GGCCGCGGccgatgcgagtgtcatcatc	CG5281R	CCCGGGGCcgtcagaaccacagatccca
	FBgn0086679	p	577	pF	GGCCGCGGgcaatcccacgcagtttctc	pR	CCCGGGGCcggtttcttacagcgcctaac
	FBgn0031320	CG5126	603	CG5126F	GGCCGCGGggacgctatcaaagccatcg	CG5126R	CCCGGGGCctccaccttgtcgcgttcat
	FBgn0015721	king-tubby	587	King-tubbyF	GGCCGCGGtggacaacatcgtggagctg	King-tubbyR	CCCGGGGCatgaccttgacttcgaatcgctta
	FBgn0000568	Eip75B (*)	601	Eip75BF	GGCCGCGGcctggagctgatcgagaagat	Eip75BR	CCCGGGGCctgctgttgttgctgctgct
	FBgn0013948	Eip93F (*)	595	Eip93FF	GGCCGCGGgcacaactgcgcaaactgag	Eip93FR	CCCGGGGCtgttgttcagcggatggtgg
	FBgn0085420	CG34391	276	CG34391F	GGCCGCGGacaatatcataccctcatcacgc	CG34391R	CCCGGGGCacgaggcggcgtaactctt
	FBgn0039734	Tace	554	TaceF	GGCCGCGGctgctccctgcgttcgat	TaceR	CCCGGGGCccttgttgcagaatcctgtg
	FBgn0035132	mthl10	593	mthl10F	GGCCGCGGggtcgtgttccggttgattc	mthl10R	CCCGGGGCcgtatgtcggaaccatgcag
	FBgn0031195	CG17600	552	CG17600F	GGCCGCGGccacacgcttgccacctc	CG17600R	CCCGGGGCagccccacatagatgggatttc
	FBgn0039718	CG15517	309	CG15517F	GGCCGCGGtctgcctcactttgggcatt	CG15517R	CCCGGGGCgggtgtcgcatttgtatttctag
	FBgn0039026	CG7029	594	CG7029F	GGCCGCGGcgacgtggcatgacagaattc	CG7029R	CCCGGGGCgctgctcacctgctcattca
	FBgn0054007	CG34007	200	CG34007F	GGCCGCGGctgcctacagtcaacgaact	CG34007R	CCCGGGGCtgtagaaattgcacgggtca
	FBgn0036618	Cpr72Eb	599	Cpr72EbF	GGCCGCGGcccaccaacttcggatacga	Cpr72EbR	CCCGGGGCgcgaagacgaccaatccaaag
Cluster 7	FBgn0003124	polo	603	poloF	GGCCGCGGcacgcgcattgagtatgagg	poloR	CCCGGGGCcgcggctttccgttgataaga
	FBgn0003607	Su(var)205	476	Su(var)205F	GGCCGCGGccctctggcaataaatcaaaacgt	Su(var)205R	CCCGGGGCaggctccagcagaataaaggtttt
	FBgn0035755	CG14830	599	CG14830F	GGCCGCGGcgccaaagtggaaaccatgtc	CG14830R	CCCGGGGCcttgcagcaggtacgttgga
	FBgn0052038	CG32038	471	CG32038F	GGCCGCGGacgtcattttcatggtactcttc	CG32038R	CCCGGGGCctatttcacagtgcgattgtgta
	FBgn0004652	fru (*)
	FBgn0010278	Ssrp (*)	596	SsrpF	GGCCGCGGaagccgagttgcgagacaag	SsrpR	CCCGGGGCatcggactcgttctcgttgg
	FBgn0003189	r	598	rF	GGCCGCGGtggaggatggcacagtgttg	rR	CCCGGGGCcgcaactggttgagcttcag
	FBgn0003479	spn-A	589	Spn-AF	GGCCGCGGtgagacgggatccattaccg	Spn-AR	CCCGGGGCgatcttgcagatgcgggtttc
	FBgn0032586	Tpr2	603	Tpr2F	GGCCGCGGcatcggcggatgcgatatac	Tpr2R	CCCGGGGCgatgtaccagcgcctttttgc
	FBgn0010328	woc (*)	601	wocF	GGCCGCGGgcattccggtcaggcgaaata	wocR	CCCGGGGCtcgtcgccgtagggattatg
	FBgn0260789	mxc (*)	601	mxcF	GGCCGCGGgagcacgaaaggctccaatg	mxcR	CCCGGGGCgtaccgggcatctgtccaaa
	FBgn0026149	BCL7-like	587	BCL7-likeF	GGCCGCGGtgtcatcaaagcgggggtag	BCL7-likeR	CCCGGGGCcatatttttcgcgccctgctg
	FBgn0033378	tsu	505	tsuF	GGCCGCGGgcattgtgcgcctgaaggaa	tsuR	CCCGGGGCtcatatagactttgtacggttgc
	FBgn0062440	CG17680	588	CG17680F	GGCCGCGGgctgcttgaatcacaaaatacgc	CG17680R	CCCGGGGCtcaaagcgggacttgaagaatac
	FBgn0259789	vfl (*)	600	vflF	GGCCGCGGcaccacctcaaccaccatca	vflR	CCCGGGGCatactgctgcgacgcctgtt
	FBgn0039558	BCAS2	591	BCAS2F	GGCCGCGGgcaaattgtcggaggtgtcc	BCAS2R	CCCGGGGCttcgctcagtgtactaaatctacg
	FBgn0030177	CG2972	598	CG2972F	GGCCGCGGccagtgccgaggaagagaaa	CG2972R	CCCGGGGCtccagagcgttcgtcttggt
	FBgn0086451	l(2)k09022	596	l(2)k09022F	GGCCGCGGccgaagcagtctcccatttg	l(2)k09022R	CCCGGGGCtgcttccagtatgggctggt
	FBgn0020639	Lcp65Af	309	Lcp65AfF	GGCCGCGGctacgagaccagcgatgga	Lcp65AfR	CCCGGGGCccgaaactaaagtttcaaaacgaac
	FBgn0035063	Eap	606	EapF	GGCCGCGGggcagcgattatgaggtgga	EapR	CCCGGGGCggccagctttcggttcttct
	FBgn0002673	twe	607	tweF	GGCCGCGGtcccaagtccacccagagaa	tweR	CCCGGGGCtccgccaaggaactcgtatg
Cluster 9	FBgn0032979	CG1832 - Clamp (*)	600	ClampF	GGCCGCGGacaaaggatttgcgcgccac	ClampR	CCCGGGGCgcgtttttgggtttcgccca
	FBgn0263258	chas	595	chasF	GGCCGCGGgccggtcaatcacttctcgt	chasR	CCCGGGGCtgtgtgggatgagtggctgt
	FBgn0053116	CG33116	601	CG33116F	GGCCGCGGttctttccgcgctggtttgc	CG33116R	CCCGGGGCgtggaagattcgccatagcac
	FBgn0053182	Kdm4B	513	Kdm4BF	GGCCGCGGttccagatcgaagcaccctag	Kdm4BR	CCCGGGGCcctggtctgtgtctgtgatac
	FBgn0036134	fd68A (*)	595	fd68AF	GGCCGCGGctttcaatggccgccactac	fd68AR	CCCGGGGCagtgtttgcgcgacacaagg
	FBgn0000541	E(bx) (*)	605	E(bx)F	GGCCGCGGggccgtggatgattctgaag	E(bx)R	CCCGGGGCgctcatacaacttggccgca
	FBgn0035769	CTCF (*)	594	CTCFF	GGCCGCGGacatacgccagcgtggaact	CTCFR	CCCGGGGCcggttctggtggctgatact
	FBgn0030452	CG4330	600	CG4330F	GGCCGCGGcaagttcgccgcaatcgtcta	CG4330R	CCCGGGGCgccaccgtgttccacaactt
	FBgn0039712	CG15514 (*)	592	CG15514F	GGCCGCGGgagcaggcgaaactgcaact	CG15514R	CCCGGGGCctggcgtaggagtccttctt
	FBgn0015907	bl	599	blF	GGCCGCGGaagtggcagtacccgtccaa	blR	CCCGGGGCcattaaagccaccggctccat
	FBgn0038043	CG17202	615	CG17202F	GGCCGCGGctcgctgaccaagctcttca	CG17202R	CCCGGGGCgcgctcatgctttatttcgcttta
	FBgn0261477	slim	595	slimF	GGCCGCGGgtttgtcgcacacgaaacga	slimR	CCCGGGGCtgctcctggtgggcagttat
	FBgn0063485	Lasp	604	LaspF	GGCCGCGGtacgtggagcaggcggttat	LaspR	CCCGGGGCagatggatatcggattgttggttc
	FBgn0050157	CG30157	590	CG30157F	GGCCGCGGcaaattacggctgcccaaggt	CG30157R	CCCGGGGCgcgacgaagccttggtactt
	FBgn0001994	crp (*)	602	crpF	GGCCGCGGgtttggccagcagcagaatc	crpR	CCCGGGGCtcggtgtggatgttgtgtcc
	FBgn0036828	CG6841	597	CG6841F	GGCCGCGGgctttcgcaggtttccgattc	CG6841R	CCCGGGGCagaacctttcgggcgttctc
	FBgn0261983	l(2)gd1	602	l(2)gd1F	GGCCGCGGccactctggatgcggaaaag	l(2)gd1R	CCCGGGGCcggaacggtattgtcctcca
	FBgn0035157	CG13894 (*)	596	CG13894F	GGCCGCGGatgcaacagcaactccagcag	CG13894R	CCCGGGGCacgaagtcctccagcggttt
	FBgn0001247	Ide	459	IdeF	GGCCGCGGtcttatggccgggcatcaga	IdeR	CCCGGGGCtgcacagtatctttggccacg
	FBgn0032896	CG14400	609	CG14400F	GGCCGCGGgctatgacaacaagcggatgc	CG14400R	CCCGGGGCgatccaaccccggatagaac
	FBgn0086444	l(2)37Cb	582	l(2)37CbF	GGCCGCGGccactctggatgcggaaaag	l(2)37CbR	CCCGGGGCcggaacggtattgtcctcca
	FBgn0033348	CG8247	593	CG8247F	GGCCGCGGaacgaggaggtggccaagtt	CG8247R	CCCGGGGCccatggggttttgccttatcc
	FBgn0259174	Nedd4	595	Nedd4F	GGCCGCGGataacaccggcaacgggagt	Nedd4R	CCCGGGGCgttctttgctgtgggcacgta
	FBgn0037633	CG9839	604	CG9839F	GGCCGCGGggttcccgactgctcttcaa	CG9839R	CCCGGGGCcgtcttccttccgcacaatc
	FBgn0024753	Flo-2	578	Flo-2F	GGCCGCGGccactggccaaaaccgatga	Flo-2R	CCCGGGGCtacgccgccaaacatcacac
				bossF	GGCCGCGGatcgcgagtcctgagctttg	bossR	CCCGGGGCgtcggatttccctcgaagac
